# Supplementary material for: Cell cycle transcriptomics of Capsaspora provides insights into the evolution of cyclin-CDK machinery
Source: PLoS Genet. 2020 Mar 16;16(3):e1008584. doi: 10.1371/journal.pgen.1008584 (PMC7098662; doi:10.1371/journal.pgen.1008584)
Supplement: S16 Text — (XLSX) [file pgen.1008584.s031.xlsx]

## Sheet: caposaspora_vs_all
				HeLa (Dominguez et al., 2016)	Foreskin fibroblasts (Bar-Joseph et al., 2008)	U2OS (Grant et al., 2013)	Core human cell cycle	S. cerevisiae (Orlando, 2007)	S. pombe (Rustici, 2004)	A. thaliana (Menges et al., 2003)
	PERIODIC LITERATURE	Orthogroups	Total OG shared	3706	3706	3706	3706	2327	2452	2859
			Ratio observed/expected periodic	0.045/3e-02	0.022/8e-03	0.027/0.016	1e-02/3e-03	0.037/2e-02	0.016/0.012	0.017/0.011
			Absolute values observed/expected periodic	167/112.156	81/28.897	99/58.717	38/10.028	86/46.374	40/30.461	48/32.019
			binomial p-value	9.1e-07	<1,00E-09	1.32e-06	<1,00E-09	1.1e-07	0.0831129	0.00736836
		One-to-one orthologues	Absolute values observed/expected periodic	69/60.843	46/18.673	33/22.563	19/6.847	48/33.886	19/21.05	-
			binomial p-value	0.298364	7e-08	0.0336664	9.556e-05	0.0185223	0.742261	-
	REANALYSIS	Orthogroups	Total OG shared	3706	3706	3706	3706	2327	2452	2859
			Ratio observed/expected periodic	0.046/0.032	0.036/0.025	3e-02/0.019	8e-03/2e-03	0.039/0.026	0.028/0.018	0.029/0.017
			Absolute values observed/expected periodic	171/118.358	132/94.343	111/69.009	31/8.181	90/59.624	69/44.278	83/47.492
			binomial p-value	3.5e-06	0.00020442	2.52e-06	<1,00E-09	0.00017505	0.00045529	2.32e-06
		One-to-one orthologues	Absolute values observed/expected periodic	78/67.69	53/48.394	38/29.721	15/4.824	48/55.939	28/38.399	-
			binomial p-value	0.195809	0.468322	0.138432	0.00015224	0.306216	0.101619	-
